# Supplementary material for: Surgical treatment of mechanical bowel obstruction: characteristics and outcomes of geriatric patients compared to a younger cohort
Source: PubMed Central journal article supplement (PMC9167188; doi:10.1007/s00384-022-04152-4), 2022-05-05
Supplement: 384_2022_4152_MOESM1_ESM.pdf [file 384_2022_4152_MOESM1_ESM.pdf]

## Additional File 1

Article Title: Surgical treatment of mechanical bowel obstruction: Characteristics and outcomes of geriatric patients compared to a younger cohort.

Journal name: International Journal of Colorectal Disease

Author names: Christian J. J. Paul, Jonas Dohmen, Cornelius J. van Beekum, Maria A. Willis, Lara Braun, Jörg C. Kalf, Arnulf G. Willms and Tim O. Vilz <sup>1</sup>

<sup>1</sup> Department of General-, Visceral-, Thoracic and Vascular Surgery, University Hospital Bonn, Germany.

Email: tim.vilz@ukbonn.de

**Supplementary Table 1.** Intraoperative findings - SBO

|                            | 40-74 years | >=75 years | p-value |
|----------------------------|-------------|------------|---------|
|                            | n = 186     | n = 71     |         |
| Cause of bowel obstruction |             |            |         |
| adhesions                  | 107 (57.5%) | 50 (70.4%) | ns      |
| all malignancies           | 39 (21.0%)  | 9 (12.7%)  | ns      |
| colorectal carcinoma       | 6 (3.2%)    | 1 (1.4%)   | ns      |
| other malignancies         | 33 (17.7%)  | 8 (11.3%)  | ns      |
| hernia                     | 14 (7.5%)   | 3 (4.2%)   | ns      |
| volvulus                   | 5 (2.7%)    | 1 (1.4%)   | ns      |
| intussusception            | 3 (1.6%)    | 2 (2.8%)   | ns      |
| gallstone ileus            | 0 (0.0%)    | 3 (4.2%)   | 0,005   |
| inflammation               | 4 (2.2%)    | 0 (0.0%)   | ns      |
| exposure to radiotherapy   | 3 (1.6%)    | 0 (0.0%)   | ns      |
| miscellaneous              | 11 (5.9%)   | 2 (2.8%)   | ns      |
| Need for bowel resection   | 82 (44.1%)  | 31 (43.7%) | ns      |
| Need for stoma creation    | 38 (20.4%)  | 14 (19.7%) | ns      |

**Supplementary Table 2.** Intraoperative findings - LBO

|                            | 40-74 years | > =75 years | p-value |
|----------------------------|-------------|-------------|---------|
|                            | n=28        | n=17        |         |
| Cause of bowel obstruction |             |             |         |
| adhesions                  | 1 (2.6%)    | 4 (23.5%)   | ns      |
| all malignancies           | 26 (68.4%)  | 9 (52.9%)   | ns      |
| colorectal carcinoma       | 12 (31.6%)  | 4 (23.5%)   | ns      |
| other malignancies         | 14 (36.8%)  | 5 (29.4%)   | ns      |
| hernia                     | 1 (2.6%)    | 1 (5.9%)    | ns      |
| volvulus                   | 1 (2.6%)    | 2 (11.8%)   | ns      |
| intussusception            | 0 (0.0%)    | 0 (0.0%)    |         |
| gallstone ileus            | 0 (0.0%)    | 0 (0.0%)    |         |
| inflammation               | 6 (15.8%)   | 0 (0.0%)    | ns      |
| exposure to radiotherapy   | 1 (2.6%)    | 0 (0.0%)    |         |
| miscellaneous              | 2 (5.3%)    | 0 (0.0%)    |         |
| Need for bowel resection   | 25 (65.8%)  | 13 (76.5%)  | ns      |
| Need for stoma creation    | 33 (86.8%)  | 10 (58.8%)  | ns      |
